# Supplementary material for: Facile synthesis of NiMoO4·xH2O nanorods as a positive electrode material for supercapacitors
Source: Royal Society of Chemistry journal article supplement (doi:10.1039/c3ra22993a), 2013-01-01
Supplement: c3ra22993a.pdf [file c3ra22993a.pdf]

## Supporting information

### **Facile synthesis of NiMoO<sub>4</sub>·xH<sub>2</sub>O nanorods as positive electrode material for supercapacitors**

Mao-Cheng Liu <sup>a</sup>, Long Kang <sup>b\*</sup>, Ling-Bin Kong <sup>a,b,\*</sup>, Chao Lu <sup>a</sup>, Xue-Jing Ma <sup>a</sup>,  
Xiao-Ming Li <sup>a</sup> and Yong-Chun Luo <sup>b</sup>

<sup>a</sup> *State Key Laboratory of Gansu Advanced Non-ferrous Metal Materials, Lanzhou University of Technology, Lanzhou 730050, PR China*

<sup>b</sup> *School of Materials Science and Engineering, Lanzhou University of Technology, Lanzhou 730050, PR China*

\* Corresponding author. Tel.: +86-931-2976579; fax: +86-931-2976578. E-mail address: [kangl@lut.cn](mailto:kangl@lut.cn); [konglb@lut.cn](mailto:konglb@lut.cn)

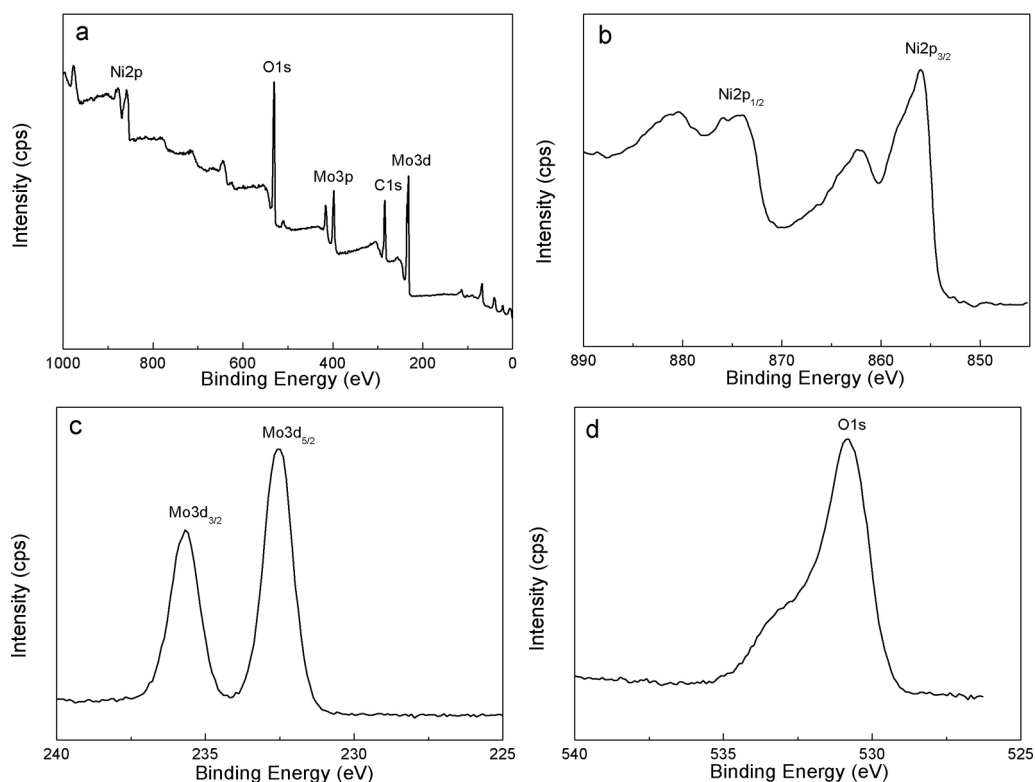

Figure S1. (a) Overall XPS, (b) Ni 2p, (c) Mo 3d and (d) O 1s XPS spectra of NiMoO<sub>4</sub>·xH<sub>2</sub>O.

The overall XPS spectrum (Fig. S1a) shows that the surface of NiMoO<sub>4</sub>·xH<sub>2</sub>O consists of Ni, Mo, and O elements. The Ni 2p XPS spectra shows two peaks at 874.5 and 856.1 eV, corresponding to the Ni 2p<sub>1/2</sub> and Ni 2p<sub>3/2</sub>, respectively (Fig. S1b). A spin-energy separation of 18.4 eV is the characteristic of Ni<sup>2+</sup> in NiMoO<sub>4</sub>·xH<sub>2</sub>O.<sup>1</sup> The Mo 3d XPS spectra of the NiMoO<sub>4</sub>·xH<sub>2</sub>O displays two peaks at 235.6 and 232.6 eV, agreeing well with Mo 3d<sub>3/2</sub> and Mo 3d<sub>5/2</sub> assigned to Mo<sup>6+</sup> in NiMoO<sub>4</sub>·xH<sub>2</sub>O (Fig. S1c).<sup>2</sup> O 1s XPS shows a strong peak around 530.8 eV which can be regarded as characteristic peak of O 1s in NiMoO<sub>4</sub>·xH<sub>2</sub>O.

Figure S2 shows the specific capacitances of the NiMoO<sub>4</sub>·xH<sub>2</sub>O fabricated at different conditions. The sample fabricated at 70 °C exhibits higher specific capacitance than one at 60 °C. We also found that 60 °C is not the optimum temperature to fabricate NiMoO<sub>4</sub>·xH<sub>2</sub>O due to the low yield at this temperature. Fig.

S2a indicates that the specific capacitance of the sample fabricated at 80 °C is close to that of the material prepared at 70 °C at a low current density of 5 mA cm<sup>-2</sup>. But it quickly decreased with the increment of the discharge current density. When the current density is 50 mA cm<sup>-2</sup>, only 30.1 % of the specific capacitance is remained. Obviously, it is lower than 60.6 % of the sample fabricated at 70 °C. We consider that the sample fabricated at 70 °C shows lower crystallinity due to mild fabrication temperature, which results in an excellent rate capability. Because of the highest specific capacitance and excellent rate capability, 70 °C is employed as the optimum temperature to synthesize NiMoO<sub>4</sub>·xH<sub>2</sub>O. Fig. S2b shows the specific capacitance of the samples synthesized through various reaction times. The specific capacitance of samples prepared through 4 and 6 h are almost equality and higher than that of 2 and 8 h, suggesting that 4 and 6 h are the better temperature to synthesize NiMoO<sub>4</sub>·xH<sub>2</sub>O. Take into above considerations, 70 °C and 4 h were chosen as optimum conditions to synthesize NiMoO<sub>4</sub>·xH<sub>2</sub>O nanorods.

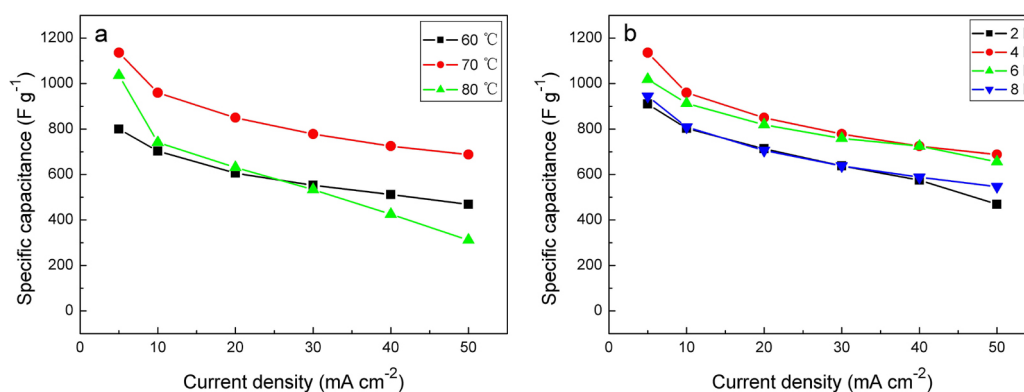

Figure S2. Specific capacitances of NiMoO<sub>4</sub>·xH<sub>2</sub>O fabricated at: (a) various temperatures and (b) various reaction times.

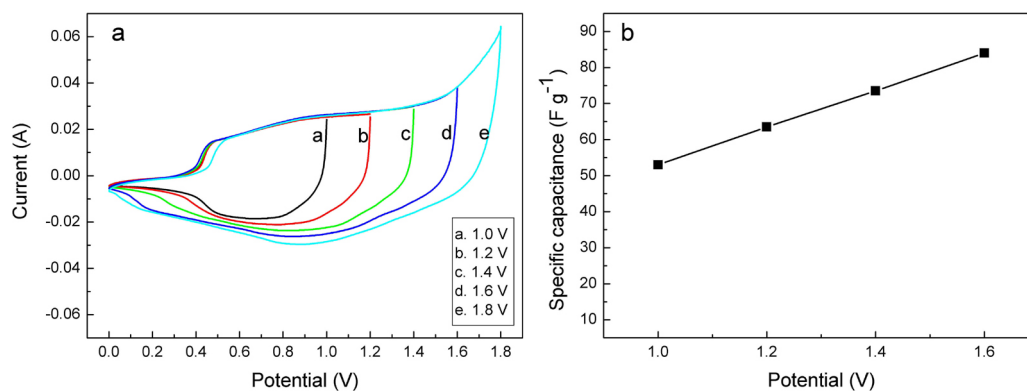

Figure S3. (a) CV curves of the AC//NiMoO<sub>4</sub>·xH<sub>2</sub>O asymmetric supercapacitor measured at different potential windows at a scan rate of 10 mV s<sup>-1</sup>. (b) Specific capacitances of the asymmetric supercapacitor with the increases of potential window.

It is very important to choose an appropriate potential window for asymmetric supercapacitor, otherwise there is a risk of damaging the cell when charge it in the high potential. Fig. S3a exhibits the CV curves with different potential windows for an assembled asymmetric supercapacitor in 2 M KOH aqueous electrolyte at a scan rate of 10 mV s<sup>-1</sup>. The current quickly increased when the scan potential exceeded 1.6 V, indicating that the O<sub>2</sub> evolution was taken place because of the water decomposition from electrolyte. Results suggest that the potential window of the cell should not exceed 0-1.6 V. Fig. S3b exhibits the variation of the specific capacitance with the increase of potential window for the cell. As shown, the specific capacitance increases significantly from 53 to 84 F g<sup>-1</sup> with the operation potential from 1.0 to 1.6 V, the stored energy can be improved at least by 405 % according to Equation 1. Given the above considerations, we chose an operation voltage window of 1.6 V in 2 M KOH aqueous electrolyte to further investigate the supercapacitive performance of the asymmetric supercapacitor.

## References

- 1 J. Yan, Z. J. Fan, W. Sun, G. Q. Ning, T. Wei, Q. Zhang, R. F. Zhang, L. J. Zhi and F. Wei, *Adv. Funct. Mater.*, 2012, **22**, 2632.
- 2 Z. W. Xu, Z. Li, X. H. Tan, C. M. B. Holt, L. Zhang, B. S. Amirkhiz and D. Mitlin, *RSC Adv.*, 2012, **2**, 2753.
